# Supplementary material for: A trap-assisted ultrasensitive near-infrared organic photomultiple photodetector based on Y-type titanylphthalocyanine nanoparticles
Source: Royal Society of Chemistry journal article supplement (doi:10.1039/c6tc00854b), 2016-01-01
Supplement: c6tc00854b1.pdf [file c6tc00854b1.pdf]

*Electronic Supplementary Information (ESI)*

**Trapped-assisted ultrasensitive near-infrared organic photomultiple photodetectors based on Y-type titanylphthalocyanine nanoparticles**

Xiaolong Li,<sup>a,b</sup> Shirong Wang,<sup>a,b</sup> Yin Xiao<sup>a,b</sup> and Xianggao Li<sup>\*a,b</sup>

<sup>a</sup>. School of Chemical Engineering and Technology, Tianjin University, Tianjin 300072, China. *E-mail*: lixianggao@tju.edu.cn.

<sup>b</sup>. Collaborative Innovation Center of Chemical Science and Engineering (Tianjin), Tianjin 300072, China.

**1. The Morphology of Y-TiOPc MPs**

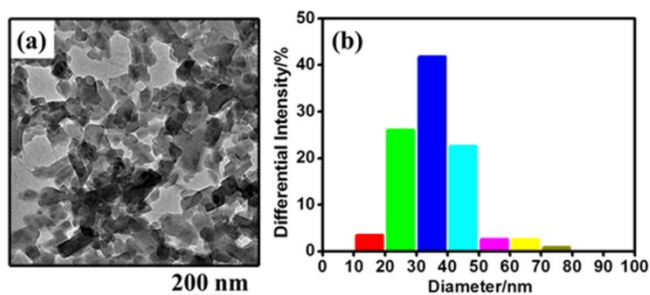

**Fig. S1** (a) TEM picture of the Y-TiOPc MPs embedded in PVB film with an average diameter of  $35.6 \pm 10.6$  nm; (b) Size distribution of the Y-TiOPc MPs embedded in PVB film.

**2. Photoelectric Performance of the OPD with Y-TiOPc MPs**

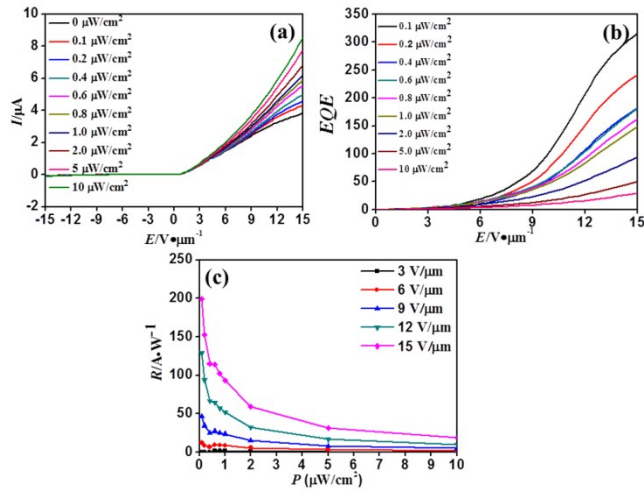

**Figure. S2** (a)  $I$ - $E$  curves of Y-TiOPc MPs as photoactive material in the dark and under different light irradiances ( $\lambda = 780 \text{ nm}$ ). (b)  $EQE$  (b) and  $R$  (c) as a function of illumination intensity under different electric field.

### 3. The internal photogeneration charge efficiency ( $\eta_{e-h}$ ) of OPDs

**Table S1.**  $\eta_{e-h}$  of OPDs based on Y-TiOPc NPs and Y-TiOPc MPs under different illumination intensities and electric field intensities.

|                           | $P$ ( $\mu\text{W}/\text{cm}^2$ ) | 0.1  | 0.2  | 0.4  | 0.6  | 0.8  | 1.0  | 2.0  | 5.0  | 10.0 |
|---------------------------|-----------------------------------|------|------|------|------|------|------|------|------|------|
| 9 $\text{V}/\mu\text{m}$  | Y-TiOPc NPs                       | 0.91 | 0.89 | 0.60 | 0.45 | 0.38 | 0.32 | 0.18 | 0.07 | 0.03 |
|                           | Y-TiOPc MPs                       | 0.60 | 0.58 | 0.52 | 0.44 | 0.36 | 0.29 | 0.15 | 0.06 | 0.02 |
| 15 $\text{V}/\mu\text{m}$ | Y-TiOPc NPs                       | 0.97 | 0.92 | 0.83 | 0.72 | 0.62 | 0.52 | 0.30 | 0.13 | 0.07 |
|                           | Y-TiOPc MPs                       | 0.85 | 0.81 | 0.74 | 0.62 | 0.53 | 0.46 | 0.27 | 0.11 | 0.06 |
